# Supplementary material for: Discordance between changes in the gut microbiota and pathogenicity in a mouse model of spontaneous colitis
Source: PubMed Central journal article supplement — Gut Microbes. 2014 Mar 24;5(3):286–95. doi: 10.4161/gmic.28622 (PMC4153765; doi:10.4161/gmic.28622), 2014-03-24
Supplement: gmic-5-286-s01.pdf [file gmic-5-286-s01.pdf]

## **Supplemental Material to:**

**Maria Elisa Perez-Muñoz, Kirk Bergstrom,  
Vincent Peng, Robert Schmaltz, Roberto  
Jimenez-Cardona, Nathan Marsteller, Sam  
McGee, Thomas Clavel, Ruth Ley, Lijun Xia,  
and Daniel A Peterson**

**Discordance between changes in the gut microbiota and  
pathogenicity in a mouse model of spontaneous colitis**

**Gut Microbes 2014; 5(3)**

**<http://dx.doi.org/10.4161/gmic.28622>**

**[http://www.landesbioscience.com/journals/gutmicrobes/  
article/28622/](http://www.landesbioscience.com/journals/gutmicrobes/article/28622/)**

## 596 SUPPLEMENTAL EXPERIMENTAL PROCEDURES

### 597 Selected Bacterial Species

598 All the bacterial species used in monoassociation experiments were grown in an  
599 anaerobic chamber with environmental conditions set as follows: 37°C, 5% CO<sub>2</sub>, 5% H and 90%  
600 N<sub>2</sub>. *Bacteroides* species included *Bacteriodes thetaiotaomicron* VPI 5482, and *Bacteroides*  
601 *sartorii* A-C2-0. Both *Bacteroides* were grown in TYG (per liter: 10g Bacto™ Tryptone (BD  
602 #211705), 5g Difco™ Yeast Extract (BD #212750), and 11 mM (2g) Glucose (Acros Organics  
603 #170080025), supplemented with 8.2mM (1g) L-cysteine (Sigma #C7352), 1ml hematin-  
604 histidine solution (12mg hematin (Sigma #H3281) dissolved in 10ml of 0.2M histidine (Sigma  
605 #H7875) pH8), 1mg vitamin K3 (Sigma #M5625), 1ml of 0.8% calcium chloride (MP  
606 Biomedicals #153502) solution, 2.6µM (0.4mg) ferrous sulfate (MP Biomedicals #0219466383),  
607 100ml of 1M potassium phosphate buffer (500ml of 1M KH<sub>2</sub>PO<sub>4</sub> (Sigma #P0662) with 1M  
608 K<sub>2</sub>HPO<sub>4</sub> (Sigma #P3786) added until pH is 7.2), and 40ml of TYG salts solution (per liter: 2mM  
609 (0.5g) MgSO<sub>4</sub> heptahydrate (Amresco #0662), 119mM (10g) NaHCO<sub>3</sub> (Sigma #54019),  
610 34.2mM (2g) NaCl (Fisher #BP358)).

611 Other bacterial species tested included: *Akkermansia muciniphila* BAA-835, grown in  
612 Difco™ Brain Heart Infusion Broth (BD #237500, prepared according to instructions); and  
613 *Lactobacillus johnsonii*, isolated from mouse fecal pellets and identified by 16s rRNA  
614 sequencing using the universal primers 8F (5'-AGAGTTTGATCCTGGCTCAG-3') and 1391R  
615 (5'-GACGGGCGGTGWGTRCA-3'), and grown in modified Difco™ MRS (BD #288210, per  
616 liter: 55g MRS, 29.2mM (10g) of maltose (Acros Organics #329911000), and 28mM (5g) of  
617 fructose (Alfa Aesar #A17718)).

618 *Bacteroides*-colonized mice were euthanized at 30 days. Mice colonized with other  
619 selected bacterial species were sacrificed at 20 days post-TM treatment.

620

### 621 **Sample preparation for Immunohistochemical and Immunofluorescence staining**

622 Samples were embedded in paraffin after fixing them in 10% formalin (Azer Scientific  
623 #CUNBF-5-G) or Carnoy's fixative (60% methanol (Fisher #A412), 30% chloroform (Sigma  
624 #C-2432), 10% glacial acetic acid (Fisher #A38-212)). Once paraffin embedded, they were left  
625 to dry at room temperature (RT) overnight. Paraffin sections of 5µm thickness were  
626 deparaffinized and rehydrated as follows: 3 washes of xylene for 3 minutes; 1 wash with  
627 xylene/ethanol (50/50) for 3 minutes; 3 washes of 100% ethanol for 3 minutes each; 3 washes of  
628 95% EtOH (3 mins/each); and one wash with dH<sub>2</sub>O for 2 minutes.

629

### 630 **Fluorescence in situ hybridization (FISH) labeling**

631 Bacterial probes used for FISH are listed in Table S3. FISH probes (MWG/Operon  
632 Technologies) were diluted with FISH Hybridization buffer (0.9M NaCl, 0.1M TRIS pH 7.2,  
633 30% Formamide, 0.1%SDS) to a final concentration of 2.5ng/µl, and aliquoted onto each tissue  
634 section (100µL per slide). Slides were incubated at 37°C overnight in a humidified chamber in  
635 the dark, and then washed with pre-warmed (37°C) FISH hybridization buffer for 15min. Excess  
636 hybridization buffer was aspirated, and tissue samples were washed with FISH wash buffer  
637 (0.9M NaCl, 0.1M TRIS pH 7.2) for 15 minutes. Afterwards, slides were rinsed twice for 2  
638 minutes with distilled water, and 4'-6'-diamidino-2-phenylindole (DAPI, 25 ng/mL) was applied  
639 for 3 minutes as a nuclear counterstain. Two additional washes with distilled water were done,  
640 and slides were mounted using PermaFluor (ThermoScientific #TA-030-FM).

641

642 **Hematoxylin and Eosin staining**

643 Briefly, starting with paraffin embedded section, the sections were washed 3 times with  
644 100% xylene, once with 50:50 xylene and 100% ethanol, twice with 100% ethanol and twice  
645 with 95% ethanol. All washes were 3 minutes long. The sections were rinsed with distilled water  
646 for 2-3 minutes after the washes. Harleco® Gill II Modified Hematoxylin (EMD/Millipore, cat#  
647 65066-85) was added and incubated for 5 minutes. Sections underwent 4 washes with tap water  
648 and immersed for 1 second in acid alcohol (1% HCl in 70% ethanol) and washed again 4 times  
649 with tap water. Next, sections were slowly immersed in ammonia water (1ml NH<sub>4</sub>OH in 1 liter of  
650 water) 5 to 6 times until sections darken. The wash step was repeated and slides were immersed  
651 in Eosin (VWR, cat # 95057-848) for 1 minute. After a final rinse with tap water, 2 minute  
652 sequential rinses were done as follows: 3 times with 95% ethanol, 3 times with 100% ethanol,  
653 once with 50:50 xylene/100% ethanol, and 3 times with 100% xylene. Slides were then mounted  
654 with Permount (Fisher #SP15-500). For Alcian blue staining, Carnoy's-fixed paraffin-embedded  
655 sections were deparffinized and rehydrated as above, then stained with 1% Alcian Blue (pH 2.5,  
656 Newcomer Supply #1003) for 20 minutes, rinsed with 5 washes of distilled water, and then  
657 counterstained with nuclear fast red (Newcomer Supply #1255) for 5 minutes. Sections were  
658 then washed 3 times and dehydrated and mounted as above. (Images were obtained using a  
659 Nikon Eclipse E600 microscope equipped with a Nikon DS-2Mv camera, using the software NIS  
660 Freeware 2.10.

661

662 **Tn Antigen staining**

663 The protocol for Tn staining was done as described by Fu et al.<sup>1</sup> Briefly, deparaffinized  
664 sections underwent biotin blocking using the Streptavidin-Biotin blocking kit (Vector  
665 Laboratories #SP2002) according to manufacturer's instructions. Sections were then incubated  
666 overnight (4 °C) with biotinylated anti-Tn antibody (mouse IgM, provided by Tongzhong Ju and  
667 Richard Cummings, Emory University, Atlanta, Georgia, USA) or with biotinylated isotype-  
668 matched control anti mouse IgM (BD cat# 553472), each at 2 µg/mL. Antibodies were  
669 biotinylated using the ProtON™ Biotin Labeling Kit (Vector Laboratories #PLK-1202). Bound  
670 antibodies were detected with horseradish peroxidase-conjugated streptavidin (Jackson  
671 Laboratories #016-030-084).

672

### 673 Lamina propria CD45<sup>+</sup> cells labeling

674 Lamina propria CD45<sup>+</sup> cell staining was performed as previously described.<sup>2</sup> Briefly, five  
675 µm-thick formalin or Carnoy's-fixed, paraffin-embedded tissue sections were deparaffinized  
676 with xylene and rehydrated through an ethanol gradient to water. Sections were blocked for 15  
677 minutes using serum-free protein block (Dakom #X0909); incubated overnight at 4°C with rat-  
678 anti mouse CD45 (Abcam #ab25386, 5µg/mL) in primary antibody dilution buffer (1°ADB) (1%  
679 BSA, 0.1% Triton-x 100, 0.05% Tween-20 in PBS); and washed twice with 1°ADB, and twice  
680 with wash buffer (WB) (0.05% Tween-20 in PBS), 5 minutes/wash. Epifluorescent labeling for  
681 all stains was carried out using AlexaFluor 488-conjugated donkey anti-rat IgG (Invitrogen  
682 #A21208) in wash buffer, for 1 hr at RT in the dark, followed by rinsing in WB (3 x 5 mins).  
683 Samples were then fixed in 4% paraformaldehyde (PFA) in PBS for 5–10 mins, rinsed in WB (3  
684 x 5 mins), counterstained with DAPI, washed 3 x 5 min in dH<sub>2</sub>O, air-dried in the dark for 20  
685 mins, and finally mounted with PermaFluor. Sections were viewed on a Nikon Eclipse 80i

686 microscope equipped with a Nikon DS-Qi1MC camera operating through NIS Elements AR  
687 software (v3.0).

688

#### 689 **DNA isolation for Pyrosequencing of 16S rRNA PCR**

690 Samples (FP, CC and LCC) from conventional mice and cecal contents from  
691 conventionalized mice were weighted and diluted in phosphate buffer (pH 7) in a 1:10 ratio,  
692 followed by centrifuging at 10,000 rpm (Eppendorf 5424) for 5 minutes. This washing step was  
693 repeated two more times to remove inhibitors. Bacterial cell pellets were resuspended in 750 $\mu$ l of  
694 lysis buffer (200mM NaCl, 20mM EDTA, 100mM Tris [pH 8.0], 20 mg/ml lysozyme (Fisher  
695 #BP535)), transferred to a sterile microcentrifuge tube containing 300mg of 0.1mm zirconium  
696 beads (BioSpec Products #11079101z), and incubated at 37°C for 30min. Afterwards, 85 $\mu$ l of  
697 10% sodium dodecyl sulfate solution (Accugene #51213) and 40 $\mu$ l of proteinase K (Amresco  
698 #0706, 15mg/ml) were added, and tubes were incubated at 60°C for 30min. After incubation,  
699 500 $\mu$ l of phenol-chloroform-isoamyl alcohol (Acros Organics #327115000, 25:24:1) were added,  
700 and samples were homogenized in a MiniBeadbeater-8 (BioSpec Products) at maximum speed  
701 for 2 minutes, followed by cooling in ice. Layers were separated by centrifugation at 14,000rpm  
702 for 5min before extraction of the top layer. This step was repeated three times with  
703 phenol:chloroform:isoamyl, and twice with chloroform-isoamyl alcohol (Acros Organics  
704 #3271155000, 24:1). DNA was recovered by inducing precipitation through the addition of 100%  
705 ethanol and 3M sodium acetate. The amount of eluting reagents used depended on the final  
706 volume of sample obtained after the last extraction step (2.5 times of ethanol per volume of  
707 sample and 1/10 volume of sample of 3M sodium acetate). Samples were stored at -20°F  
708 overnight followed by centrifugation at 14,000rpm (Eppendorf 5424) for 30min. Ethanol was

709 discarded, DNA pellets were allowed to dry at room temperature, and resuspended in 100µl of  
710 10mM Tris-HCL buffer (pH8).

711

### 712 **Primers used for Pyrosequencing of 16S rRNA**

713 The primer sequences used for the analysis of conventional mice samples were as  
714 follows: 454\_27F *5'-GCCTTGCCAGCCCGCTCAGTCAGTCAGAGTTTGATCCTGGCTCAG-3'* and  
715 454\_338R *5'-GCCTCCCTCGCGCCATCAGNNNNNNNNNNNNNCATGCTGCCTCCCGTAGGAGT-3'*;  
716 where the italicized sequences are the 454 Life Sciences primers B and A, and the bold  
717 sequences are the broadly conserved bacterial primer 27F and the broad-range bacterial primer  
718 338R, respectively. The NNNNNNNNNNNNN region in the reverse primer represents the unique  
719 12-base barcode used to tag each PCR product with a “CA” inserted as a linker between the  
720 barcode and the reverse primer. PCR conditions were: 5mins at 95°C; followed by 30 cycles of  
721 45s at 95°C, 45s at 57°C, and 2min at 72°C; and lastly 10min at 72°C in an Eppendorf  
722 Mastercycler® thermocycler. PCR products were visualized by gel electrophoresis. Amplicons  
723 from individuals samples were mixed in equal amounts based on concentration, and purified  
724 using the QIAGEN MiniElute Gel extraction kit (QIAGEN #28604). The final purified product,  
725 with a concentration of 29.99ng/ml was submitted to emulsion PCR and sequenced using a  
726 Roche 454 FLX pyrosequencer at the Cornell University Life Sciences Core Laboratories  
727 Center. Sequences obtained from pyrosequencing were filtered and submitted to quality control  
728 parameters.

729 DNA extracted from the conventionalized mice was amplified and processed for  
730 pyrosequencing by the Johns Hopkins University Sequencing Core Facility using a Roche GS  
731 Junior System. The primer sequences used for these set of samples were as follows: 357F 5'-

732 *CCTATCCCCTGTGTGCCTTGGCAGTCTCAGCCTACGGGAGGCAGCAG-3'* and 926R 5'-  
733 *CCATCTCATCCCTGCGTGTCTCCGACTCAGNNNNNNNNNNCCGTCAATTCMTTTRAGT-3'*; where the  
734 italicized sequences are the 454 Life Sciences primers B and A, the bold sequences are the  
735 bacterial primer 357F and 926R, respectively, and the NNNNNNNNNN region, with a "TCAG"  
736 inserted as a linker between the barcode and the primer, represents the unique 10-base barcode  
737 used to tag each sample.

738

### 739 **Selection and Analysis of OTUs**

740 Taxonomic-independent methods were used to estimate species diversity in both datasets.  
741 Sequences were aligned and clustered using the *Aligner* and *Complete Linkage Clustering*  
742 algorithm available through the *Pyrosequencing pipeline* of the RDP. Clustering was done with  
743 a threshold of 97% pairwise identity for assignment into operational taxonomic units (OTUs).  
744 Initial clustering of the sequences in the *conventional* dataset by *Complete Linkage Clustering*  
745 produced a total of 3,641 OTUs. After selecting representative sequences for each OTU, a single  
746 best BLAST hit was identified for all sequences in the dataset using BioEdit Blastall function by  
747 blasting them against the dataset of non-chimeric sequences. OTUs over 300 bases long, over  
748 97% identity, and containing more than 100 hits in total were kept for analysis. This filtering  
749 step produced a total of 891 OTUs. A new set of representative sequences was selected from the  
750 group of 891 OTUs, and the blasting step was repeated. Sequences that overlapped between  
751 OTUs were determined by comparing the sequences that comprise each OTU, and were merged  
752 together, resulting in 206 OTUs, from which representative sequences were selected and blasted  
753 against the dataset. Hits were counted using Excel. The filtering step was repeated as before  
754 producing a total of 184 unique OTUs. Proportions were calculated and significance of the OTUs



755 was determined by calculating the average mean of proportions and Z score.<sup>3</sup> A critical value of  
756 3.29 ( $\alpha=0.001$ ) was selected to determine statistical significance using the following formula:

$$Z = \frac{(p_1 - p_2)}{\left\{ P(1-P) \left( \frac{1}{n_1} + \frac{1}{n_2} \right) \right\}^{1/2}}$$

$$\text{where } P = \frac{p_1 n_1 + p_2 n_2}{n_1 + n_2}$$

757

758 being  $n_1$  and  $n_2$  the random sizes of samples 1 and 2, and  $p_1$  and  $p_2$  their respective proportions.

759 Pyrosequencing of the *conventionalized* samples produced a total of 61,384 sequences.

760 Eighteen percent were removed as chimeras, leaving a total of 56,527 sequences for analysis.

761 Taxonomic and non-taxonomic based analyses were performed following the procedure

762 described above (as for the conventional dataset). For OTUs, clustering of sequences for the

763 conventionalized mice dataset produced a total of 709 OTUs. After filtering and removal or

764 overlapping OTUs, OTUs were reduced to 340 accounting for 99% of the sequences.

765 Taxonomy was assigned for each OTU representative sequence by selecting the Best

766 Blast result from a local type strain database using BioEdit Blast. Additionally, representative

767 sequences from each OTU were aligned using PyNast, and used to construct a reference

768 phylogenetic tree through QIIME. This phylogenetic tree was used for Unweighted UniFrac

769 analysis.

770

771

772

773

774 **SUPPLEMENTAL REFERENCES**

- 775 1. Fu, J., Wei, B., Wen, T., Johansson, M.E.V., Liu, X., Bradford, E., Thomsson, K.A.,  
776 McGee, S., Manssur, L., Tong, M. et al. (2011). Loss of intestinal core 1-derived O-  
777 glycans causes spontaneous colitis in mice. *J Clin Invest* 121:4:1657-66
- 778 2. Tobisawa, Y., Imai, Y., Fukuda, M., and Kawashima, H. Sulfation of colonic mucins by  
779 N-acetylglucosamine 6-O-sulfotransferase-2 and its protective function in experimental  
780 colitis in mice. *J. Biol Chem* (2010) 285:6750-60
- 781 3. Kanji, G.K. (2006) Z test for the equality of two proportions. In 100 Statistical Tests.  
782 SAGE Publications Ltd, London. 3<sup>rd</sup> edition, p27

783

784

785

786

787

788

789

790

791

792

793

794

795

796

797

798  
799  
800

**Table S1. Mice average daily weight gain (ADG) and standard deviations (SD)  
per treatment and per genotype to assess development of colitis**

| <b>Treatment</b>                  | <b>ADG WT <math>\pm</math> SD (g)</b> | <b>ADG TM-IEC<br/><i>C1galt1</i><sup>-/-</sup> <math>\pm</math> SD (g)</b> | <b>P-value</b> |
|-----------------------------------|---------------------------------------|----------------------------------------------------------------------------|----------------|
| <b>Germ-free 20d</b>              | 0.14 $\pm$ 0.07                       | 0.12 $\pm$ 0.03                                                            | 0.4769         |
| <b>Germ-free 30d</b>              | 0.11 $\pm$ 0.03                       | 0.10 $\pm$ 0.03                                                            | 0.5993         |
| <b><i>B. thetaiotaomicron</i></b> | 0.10 $\pm$ 0.04                       | 0.07 $\pm$ 0.04                                                            | 0.2474         |
| <b><i>B. sartorii</i></b>         | 0.08 $\pm$ 0.06                       | 0.06 $\pm$ 0.02                                                            | 0.6371         |
| <b><i>A. muciniphila</i></b>      | 0.11 $\pm$ 0.02                       | 0.13 $\pm$ 0.06                                                            | 0.5528         |
| <b><i>L. johnsonii</i></b>        | 0.14 $\pm$ 0.06                       | 0.16 $\pm$ 0.08                                                            | 0.6850         |
| <b>Conventionalized</b>           | 0.07 $\pm$ 0.06                       | 0.10 $\pm$ 0.04                                                            | 0.3511         |

801  
802  
803  
804  
805  
806  
807  
808  
809  
810  
811

Table S2. Statistically Significant Operational Taxonomic Units per anatomical site

| OTU number | Representative sequence | cecal TM-IEC <i>C1galfl1-/-</i> | cecal WT | cecal Z value | fecal TM-IEC <i>C1galfl1-/-</i> | fecal WT | fecal Z value | LCC TM-IEC <i>C1galfl1-/-</i> | LCC WT | LCC Z value | Percent (%) identity | Species/Best Blast Results Type strain database |
|------------|-------------------------|---------------------------------|----------|---------------|---------------------------------|----------|---------------|-------------------------------|--------|-------------|----------------------|-------------------------------------------------|
| 1744       | fecalwr4_100687         | 0.0307                          | 0.0161   | 3.3937        | 0.0181                          | 0.0210   | -0.7301       | 0.0257                        | 0.0233 | 0.6134      | 91                   | Algoriphagus halophilus                         |
| 15434      | LCCwr2_14989            | 0.0032                          | 0.0136   | -4.2406       | 0.0008                          | 0.0038   | -2.3511       | 0.0028                        | 0.0298 | -8.1531     | 91                   | Allobaculum stercoricans                        |
| 19122      | cecalwr4_156667         | 0.0036                          | 0.0056   | -1.0974       | 0.0013                          | 0.0050   | -2.3880       | 0.0009                        | 0.0073 | -3.8169     | 96                   | Anaerotruncus colihominis                       |
| 79         | cecalwr4_233197         | 0.0526                          | 0.0463   | 1.0294        | 0.0348                          | 0.0755   | -6.3494       | 0.0724                        | 0.0769 | -0.6776     | 92                   | Bacteroides fragilis                            |
| 17587      | cecalko1_43511          | 0.0076                          | 0.0080   | -0.1612       | 0.0069                          | 0.0172   | -3.3789       | 0.0068                        | 0.0062 | 0.3055      | 91                   | Bacteroides tectus                              |
| 889        | LCCko4_107859           | 0.0066                          | 0.0180   | -3.8147       | 0.0108                          | 0.0263   | -4.1128       | 0.0128                        | 0.0119 | 0.3148      | 92                   | Barnesiella viscericola                         |
| 3          | cecalwr3_8802           | 0.0037                          | 0.0180   | -5.1414       | 0.0063                          | 0.0040   | 1.0980        | 0.0025                        | 0.0031 | -0.4158     | 91                   | Blautia hydrogenotrophica                       |
| 7142       | cecalwr4_225040         | 0.0004                          | 0.0077   | -4.4140       | 0.0005                          | 0.0020   | -1.5281       | 0.0002                        | 0.0031 | -2.6719     | 91                   | Clostridium aldenense                           |
| 165        | cecalko4_30502          | 0.0077                          | 0.0001   | 4.1634        | 0.0147                          | 0.0000   | 5.5299        | 0.0108                        | 0.0002 | 6.0149      | 97                   | Clostridium disporicum                          |
| 9022       | cecalwr1_107537         | 0.0059                          | 0.0181   | -4.1329       | 0.0060                          | 0.0046   | 0.6411        | 0.0041                        | 0.0094 | -2.5225     | 90                   | Clostridium jejuense                            |
| 6028       | fecalco1_63023          | 0.0678                          | 0.0736   | -0.8158       | 0.1059                          | 0.1756   | -7.0355       | 0.0935                        | 0.1266 | -4.1777     | 97                   | Eubacterium bifforme                            |
| 770        | LCCwr1_102773           | 0.0004                          | 0.0038   | -2.8031       | 0.0011                          | 0.0108   | -4.6699       | 0.0006                        | 0.0061 | -3.6155     | 94                   | Eubacterium bifforme                            |
| 871        | fecalco3_101523         | 0.0332                          | 0.0072   | 6.3751        | 0.0476                          | 0.0168   | 5.8349        | 0.0377                        | 0.0129 | 6.4325      | 99                   | Lactobacillus intestinalis                      |
| 10920      | LCCko1_17826            | 0.1689                          | 0.0879   | 8.5389        | 0.3361                          | 0.1399   | 15.6044       | 0.2579                        | 0.1360 | 12.3351     | 99                   | Lactobacillus johnsonii                         |
| 4363       | cecalco3_75532          | 0.0250                          | 0.0201   | 1.1914        | 0.0093                          | 0.0251   | -4.3586       | 0.0201                        | 0.0296 | -2.3904     | 94                   | Parabacteroides distasonis                      |
| 11         | cecalwr3_15009          | 0.0036                          | 0.0094   | -2.6655       | 0.0020                          | 0.0090   | -3.4410       | 0.0045                        | 0.0134 | -3.6872     | 94                   | Parabacteroides distasonis                      |
| 8594       | fecalwr2_204110         | 0.0144                          | 0.0255   | -2.8946       | 0.0052                          | 0.0196   | -4.7119       | 0.0168                        | 0.0284 | -3.0631     | 96                   | Parabacteroides merdae                          |
| 161        | LCCko3_63397            | 0.0058                          | 0.0019   | 2.1982        | 0.0085                          | 0.0011   | 3.4978        | 0.0073                        | 0.0032 | 2.3174      | 91                   | Parasutterella excrementihominis                |
| 12         | fecalco2_41438          | 0.0436                          | 0.1098   | -9.1405       | 0.0627                          | 0.0709   | -1.1368       | 0.0516                        | 0.0536 | -0.3486     | 86                   | Prevotella loeschii                             |

Values represent Weighted Means of Proportions and Z values. Critical value = 3.29 ( $\alpha=0.001$ )

813

**Table S3. Bacterial probes used for FISH analysis**

814

| <b>Probe</b> | <b>Target</b>                                     | <b>Sequence</b>                   | <b>5' conjugation</b> |
|--------------|---------------------------------------------------|-----------------------------------|-----------------------|
| EUB338       | Universal bacterial probe                         | 5'-GCT GCC TCC CGT AGG AGT-3'     | Texas Red             |
| CFB286       | Chlorobi/ Fibrobacteres Bacteroidetes Superphylum | 5'-TCC TCT CAG AAC CCC TAC-3'     | Alexa Fluor 488       |
| MUC1437      | <i>Akkermansia muciniphila</i>                    | 5'-CCT TGC GGT TGG CTT CAG AT -3' | Alexa Fluor 488       |
| NON338       | Nonsense/non-specific probe (negative control)    | 5'- ACT CCT ACG GGA GGC AGC-3'    | Texas Red             |
| GAM42a       | Gamma Proteobacter Phylum                         | 5'- GCC TTC CCA CAT CGT TT-3'     | Alexa Fluor 488       |

815

816

817

818

819

820

821

822

823

824

825

826

827

828

829

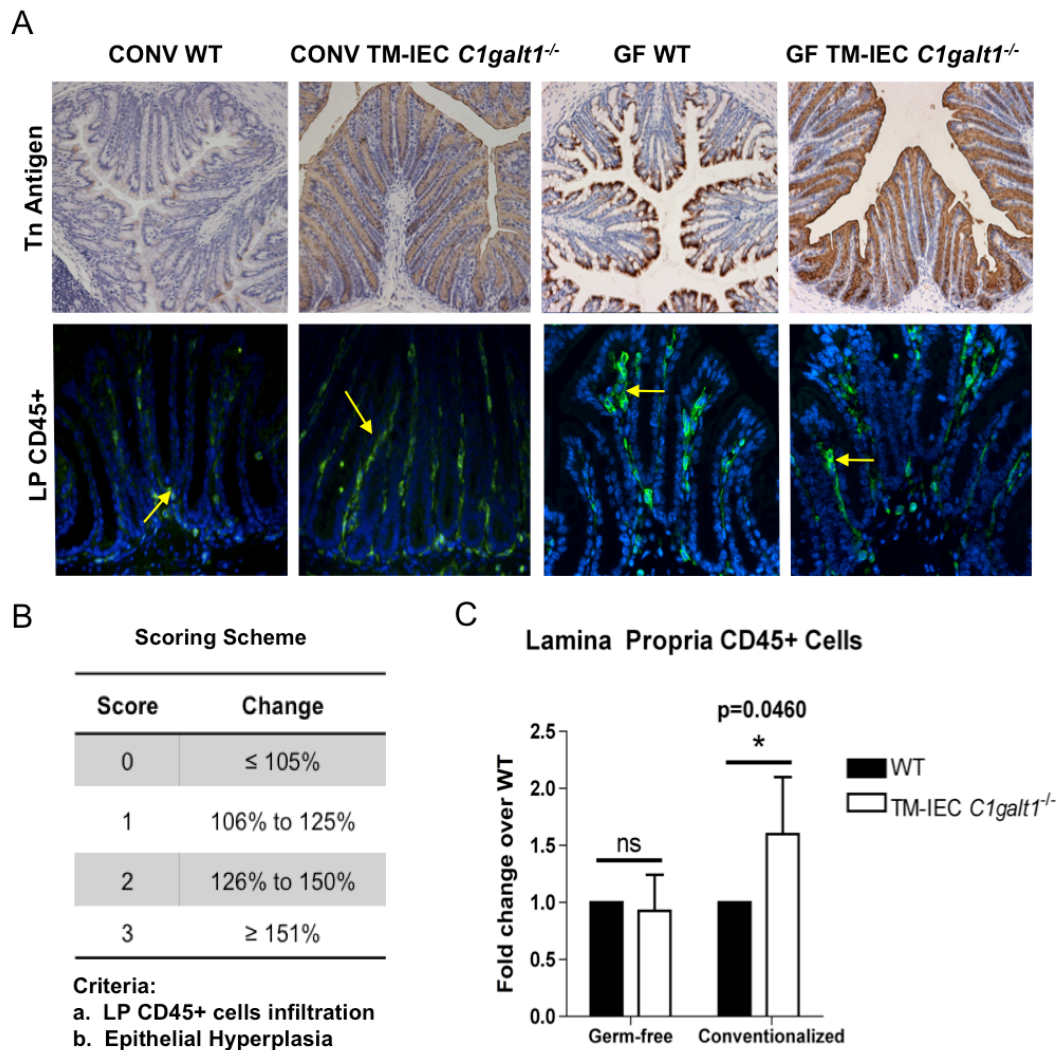

**Figure S1. Increases in Tn antigen expression and infiltration of lamina propria CD45<sup>+</sup> cells were observed in the conventionalized TM IEC *C1galt1*<sup>-/-</sup> mice.** [A] Tn antigen staining and CD45<sup>+</sup> cells staining showed increases in both Tn antigen (stained brown) and infiltration of LP CD45<sup>+</sup> cells (green dots, pointed by yellow arrows) in the colon of TM IEC *C1galt1*<sup>-/-</sup> mice relative to the WT. [B] Parameters used to determine histological scoring for assessment of inflammation in the colon (infiltration of CD45<sup>+</sup> cells in the tissue and epithelial hyperplasia). [C] The number of CD45<sup>+</sup> cells in the conventionalized TM-IEC *C1galt1*<sup>-/-</sup> mice doubled, possibly due to an increased exposure of the microbiota to the intestinal epithelia caused by a breach in the mucus layer. Bars represent fold change over WT; error bars represent standard deviations. P-values were estimated for changes between genotypes (WT *versus* TM-IEC *C1galt1*<sup>-/-</sup>).

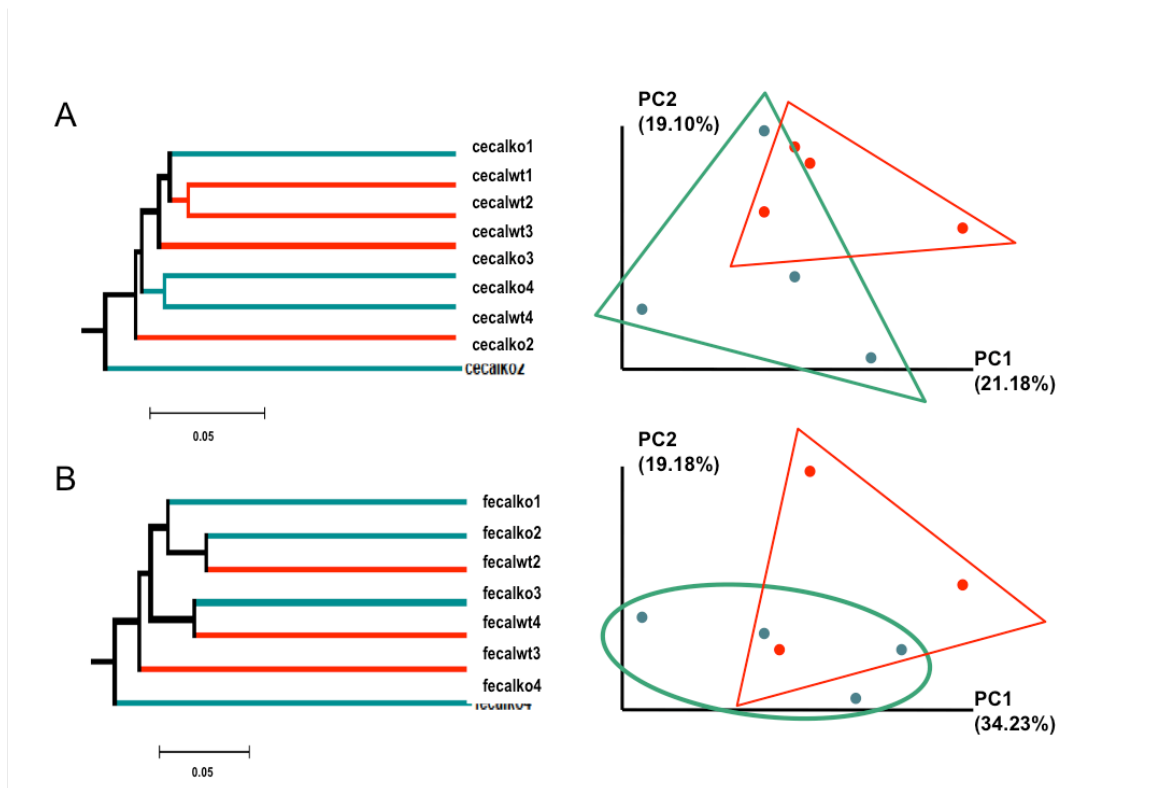

**Figure S2. The microbial communities from cecal contents and fecal pellets of WT and TM-IEC *Clgalt1*<sup>-/-</sup> mice share similarities in composition.** Unlike LCC samples, where two distinct microbial communities were found between the genotypes, the microbial communities of the cecal contents and the fecal pellets between the WT and the TM-IEC *Clgalt1*<sup>-/-</sup> mice share similarities in composition. KO: TM-IEC *Clgalt1*<sup>-/-</sup> mice. Red dots and lines represent the WT mice. Green dots and lines represent the TM-IEC *Clgalt1*<sup>-/-</sup> mice.

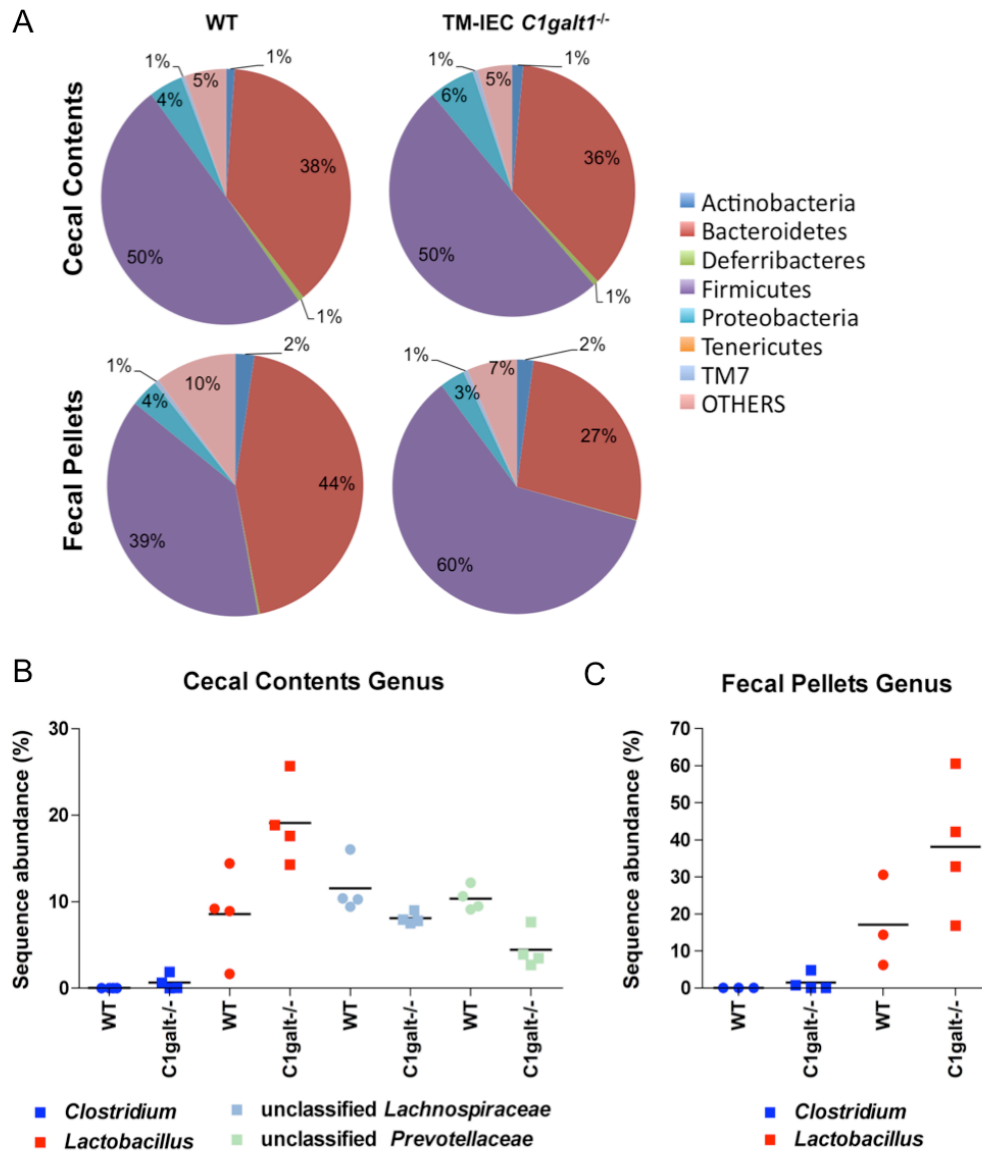

**Figure S3. Lack of core 1-derived O-glycans caused increases in Firmicutes and decreases in Bacteroidetes.** [A] Pie charts represent the abundance (in percentage) of bacterial phyla present per genotype. An increase of 21% in Firmicutes and a relative decrease of 17% in *Bacteroidetes* were found in the fecal population of the TM-IEC *C1galt1*<sup>-/-</sup> mice relative to the WT. However, these changes were not observed in the contents of the cecum. [B-C] Anatomical site-specific microbial decreases at the genus level were found in the TM-IEC *C1galt1*<sup>-/-</sup> mice. Statistically significant decreases in unclassified *Prevotellaceae* were found exclusively in the cecal contents. Horizontal bars represent means.



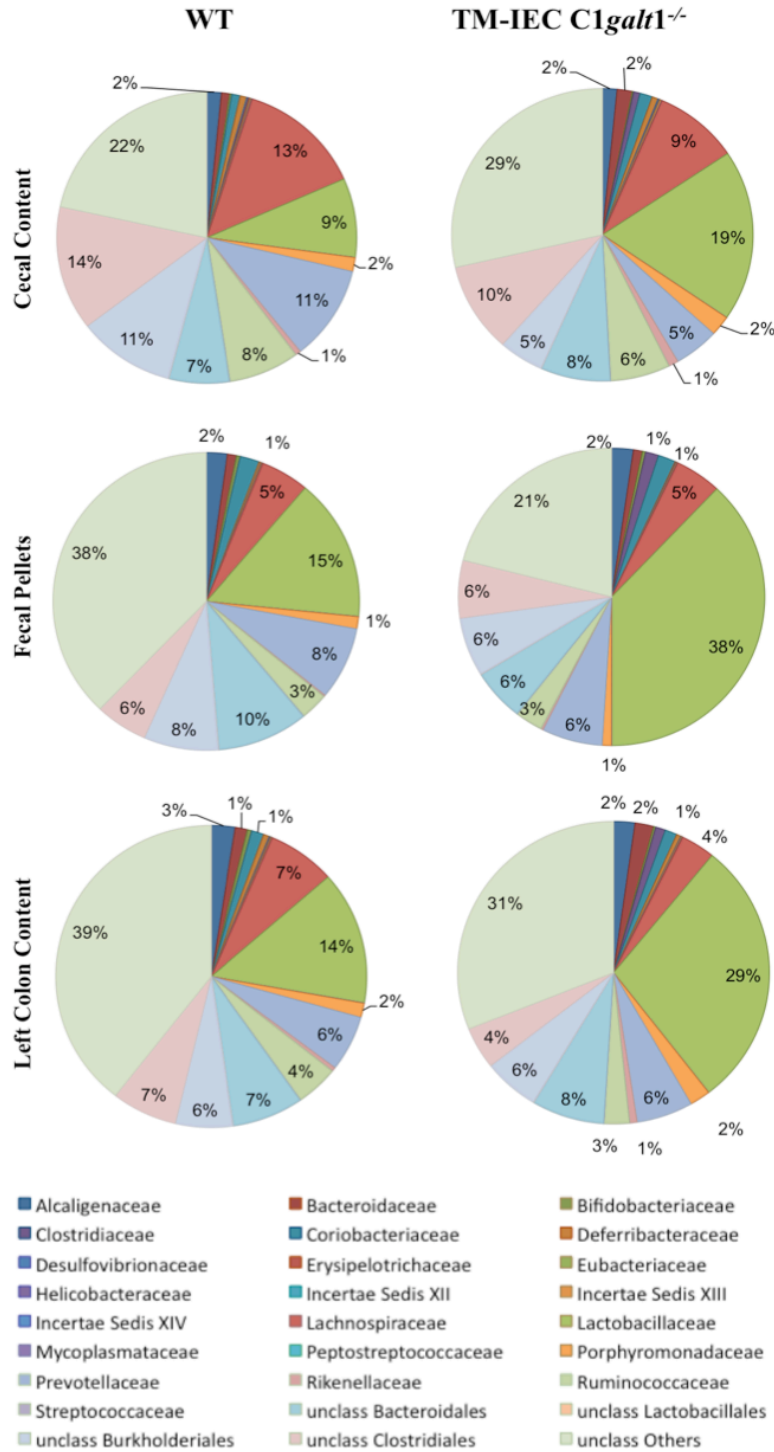

**Figure S4.** The net change in the population of Firmicutes at the Family level is the result of increases in *Clostridiaceae* and *Lactobacillaceae*, and decreases in *Ruminococcaceae* and *Lachnospiraceae*, *Clostridiaceae* and *Lactobacillaceae* consistently increased in all anatomical sites in the TM-IEC *C1galt1*<sup>-/-</sup> mice. Pie charts represent the abundance (in percentage) of bacterial families present in each anatomical site per genotype.

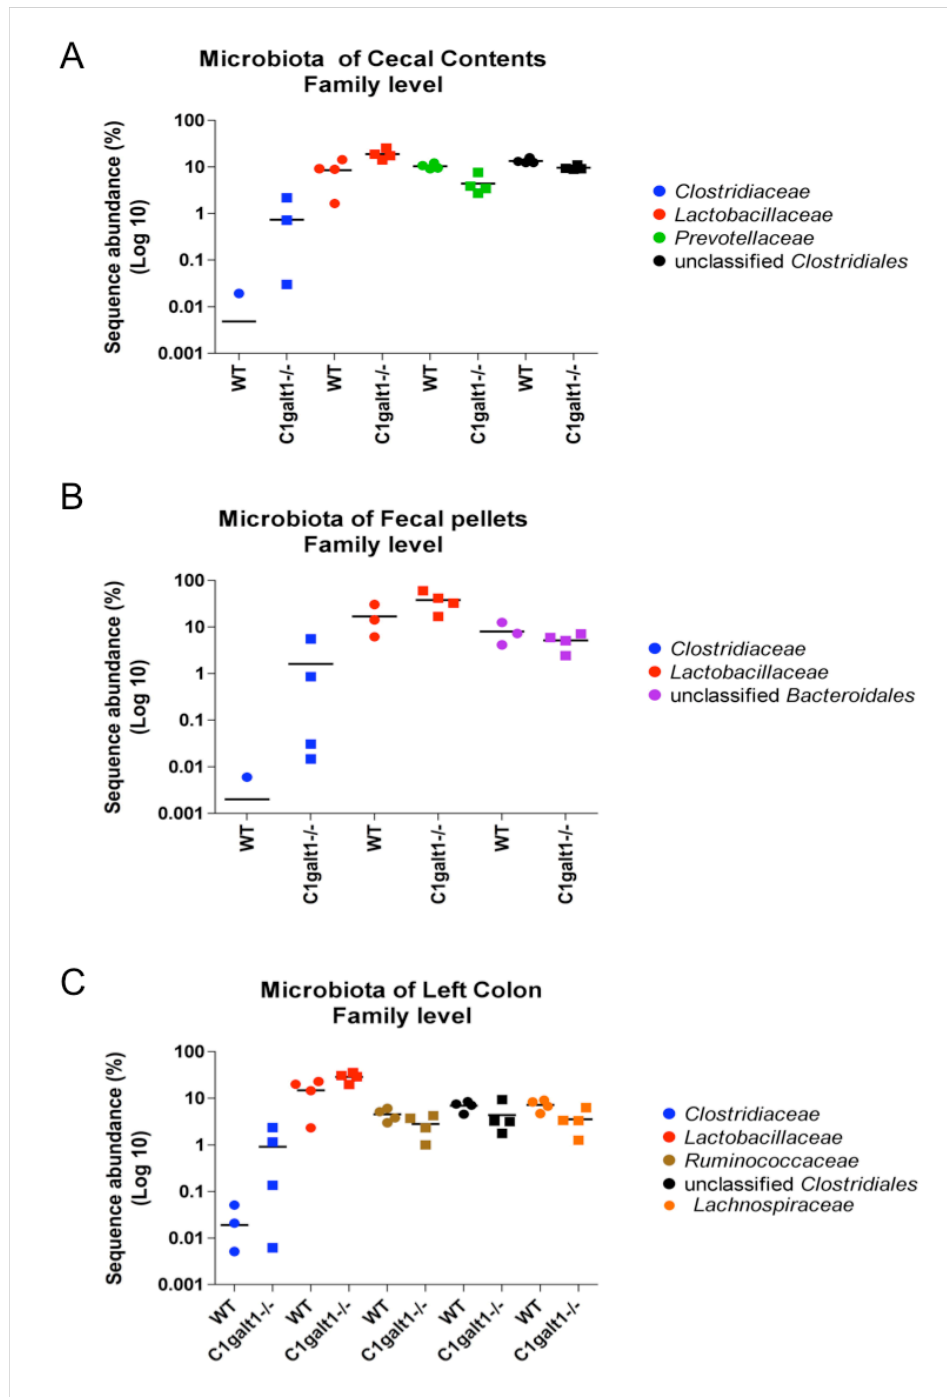

**Figure S5. Anatomical site-specific decreases were found in the TM-IEC *C1galt1*<sup>-/-</sup> mice at the Family level.** Decreases in *Prevotellaceae* were found exclusively in the cecal contents [A], while decreases in unclassified *Bacteroidales* were found exclusively in the fecal pellets [B], and decreases in *Ruminococcaceae* were found exclusively in the LCC [C] of the TM-IEC *C1galt1*<sup>-/-</sup> mice. Horizontal bars represent means. N=3-4 for each anatomical site tested, data points equal to zeros are not shown as the y-axis is in log<sub>10</sub> scale.

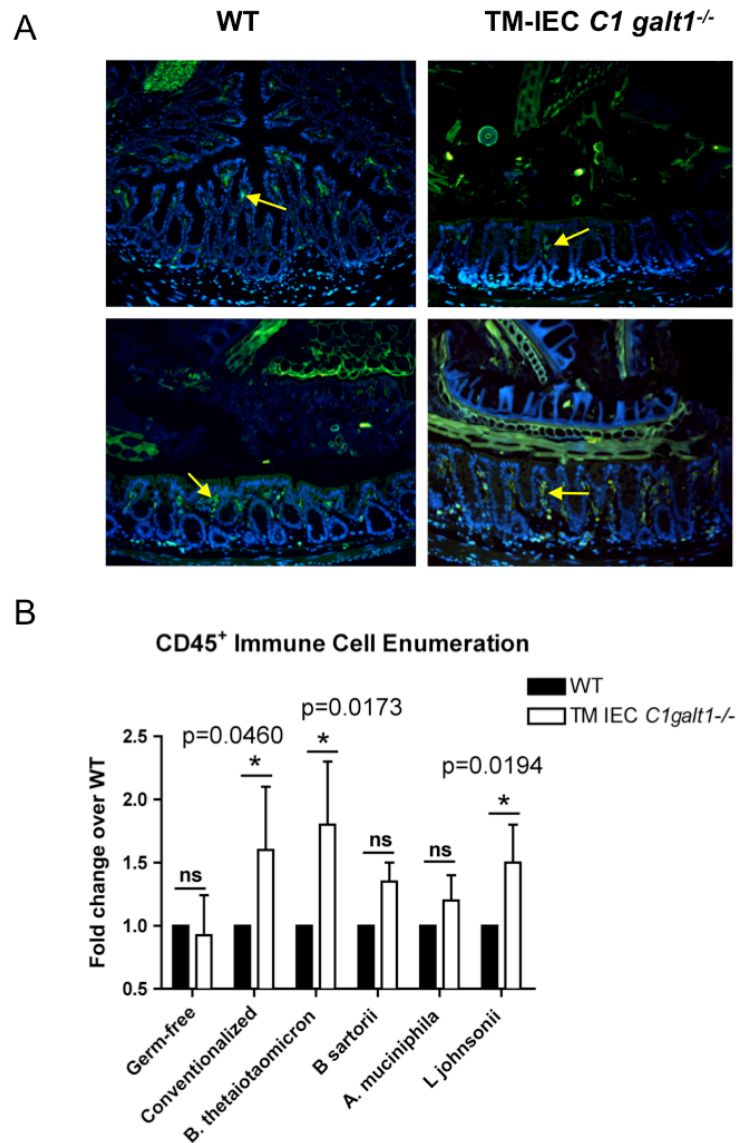

**Figure S6. Intestinal symbiont *Bacteroides thetaiotaomicron* induced the highest degree of infiltrated lamina propria CD45<sup>+</sup> cells into the colon tissue in the absence of core 1-derived O-glycans.** [A] Changes in number of CD45<sup>+</sup> cells (pointed by yellow arrows) were estimated to evaluate the immune response caused by the bacteria in the case of a breach in the mucus layer, relative to bacterial association in an intact mucosal barrier. [B] Lack of core 1 O-glycans and single association of GF mice with *B. thetaiotaomicron* caused the strongest immune response than mice associated with a complete microbiota, as measured by changes in infiltrated lamina propria CD45<sup>+</sup> cells. *B. thetaiotaomicron* caused a 1.8 fold-change increase in the number of CD45<sup>+</sup> cells. Vertical bars represent fold change over WT. Error bars represent standard deviations. P-values were estimated for changes between genotypes (WT versus TM-IEC *C1galt1<sup>-/-</sup>*).

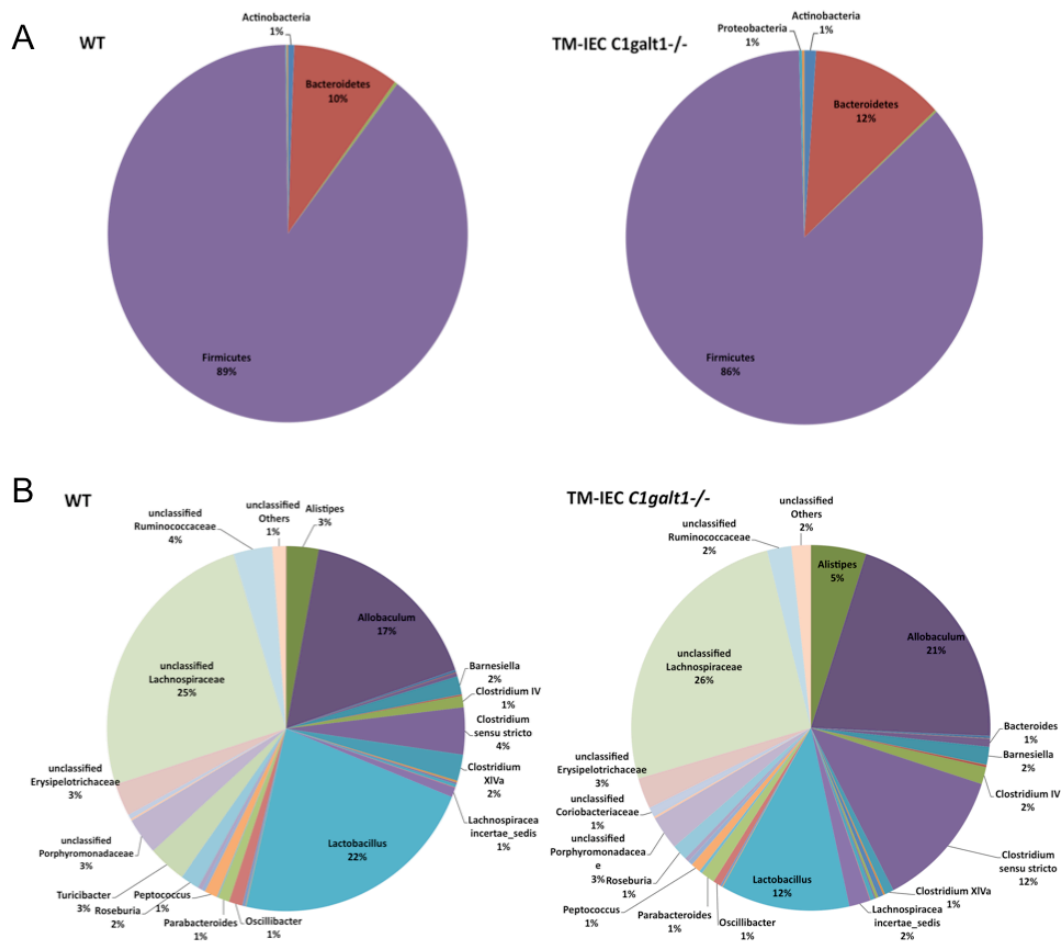

**Figure S7: The microbiota of the conventionalized WT and TM-IEC *C1galt1*<sup>-/-</sup> differs in composition from the microbiota of the conventional WT and TM-IEC *C1galt1*<sup>-/-</sup> mice, although some similarities exist. [A] No significant changes in microbial taxa were found at the phylum level between the genotypes in the cecal contents of the conventionalized mice. [B] Significant changes at the genus level include increases in the *Clostridium sensu stricto* group (which includes *Clostridium disporicum*), and decreases in *Clostridium XIVa*, *Lactobacillus* and *Turicibacter*.**

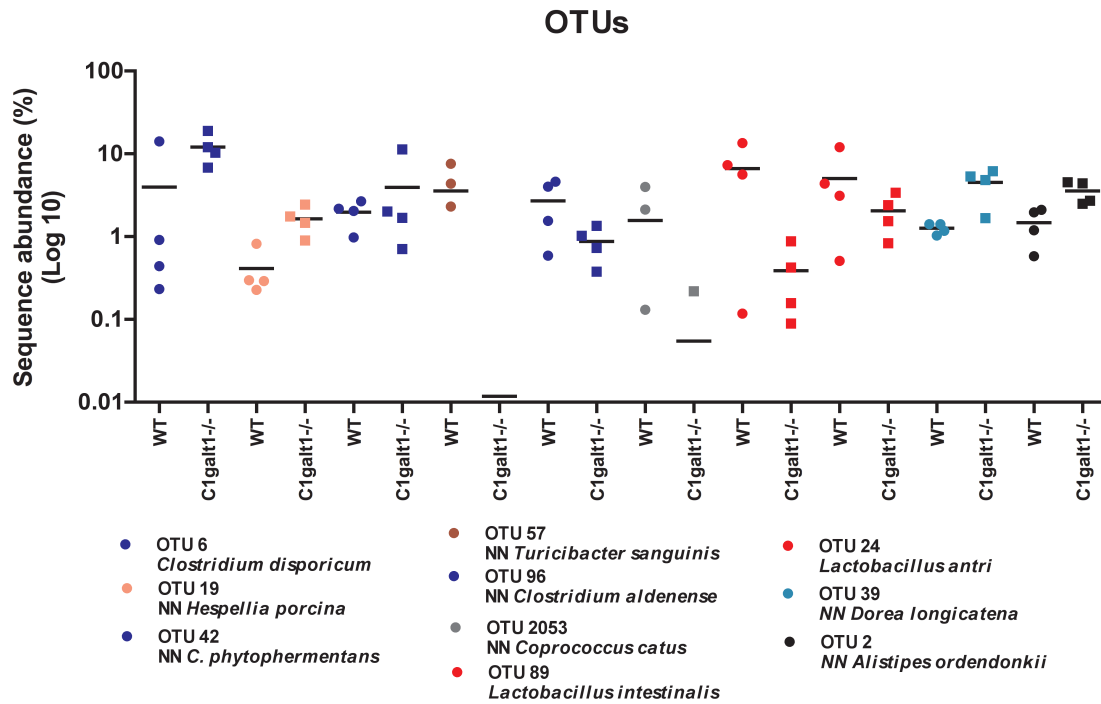

**Figure S8. OTUs analysis for the conventionalized mice revealed *Clostridium disporicum* as the main similarity and significant change in the microbiota of the TM-IEC *C1galt1<sup>-/-</sup>* when compared to the conventional microbiota.**

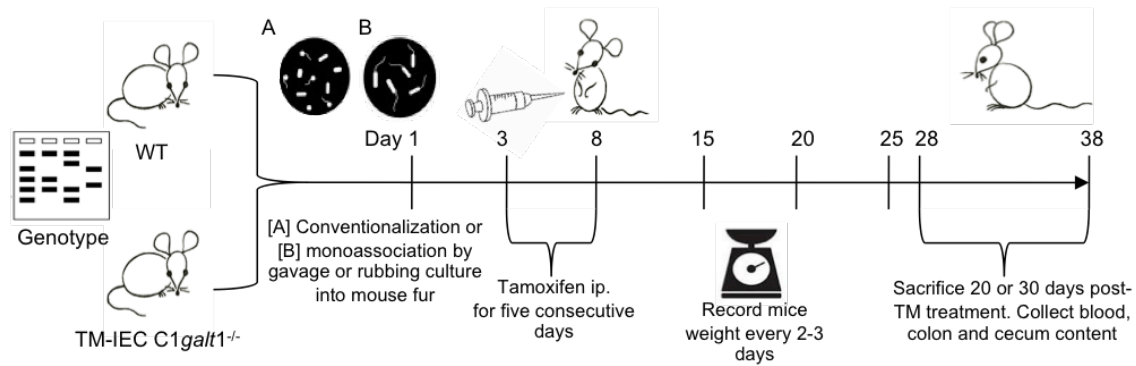

**Figure S9. Schematic representation of the experimental protocol.** GF mice were colonized with either 200 $\mu$ l of diluted cecal contents from conventional mice or with single bacterium pure culture. Subsequently (48 to 72 hours post-colonization), 1 mg of Tamoxifen (TM) diluted in an ethanol and sunflower oil mixture (1:9 v/v) was injected intraperitoneally for five consecutive days to both WT and TM-IEC *C1galt1*<sup>-/-</sup> mice. Mice were sacrificed 20 or 30 days after TM treatment, depending on bacterial species tested.
